# Supplementary material for: Prediction of virus-host protein-protein interactions mediated by short linear motifs
Source: PubMed Central journal article supplement (PMC5345135; doi:10.1186/s12859-017-1570-7), 2017-03-09
Supplement: 12859_2017_1570_MOESM4_ESM.pdf [file 12859_2017_1570_MOESM4_ESM.pdf]

# Supplemental information

## Prediction of virus-host protein-protein interactions based on short linear motifs

Andrés Becerra, Victor A. Bucheli, Pedro A. Moreno  
{andres.becerra,victor.bucheli,pedro.moreno}@correounivalle.edu.co

Full list of author information is available at the end of the article

### S1 HIV-1 Sequences

The number of sequences obtained from the NIAID database is given in Table S1 [1]. The number of randomized sequences generated to obtain the rare motif set ( $R$ ) are 1000 times the values presented in Table S1. The randomized sequences are available on request.

**Table S1** Number of sequences per HIV-1 protein

| Protein | Sequences |
|---------|-----------|
| ca      | 1942      |
| env     | 2600      |
| gag-pol | 3626      |
| gp41    | 2600      |
| gp120   | 2600      |
| in      | 1182      |
| ma      | 1942      |
| nc      | 1942      |
| nef     | 2415      |
| p1      | 1942      |
| p6      | 1942      |
| pol     | 1182      |
| pr      | 1182      |
| rev     | 1239      |
| rt      | 1182      |
| rtp51   | 1182      |
| tat     | 1131      |
| vif     | 1517      |
| vpr     | 1113      |
| vpu     | 1873      |

### S2 Disordered regions

The disordered regions were computed using IUPred [2] with the window addition explained in the methods section [3]. The results are in text files named with the pattern regions-proteinName, where proteinName is one of the protein names in Table S1.

The files have the following layout:

---

```
B.FR.83.HXB2_LAI_IIIB_BRU.K03455716-1004, 275 287 ,  
B.AR.00.ARMS008.AY037269716-1004, 274 287 ,  
B.AR.03.03.AR137681.DQ383748716-1004, 274 287 ,  
B.AR.03.03.AR138910.DQ383749719-1007, 274 287 ,  
B.AR.98.ARCH054.AY037268716-1004, 274 287 ,
```

---

Each line contains a sequence id and a list of comma-separated disordered regions. Each disordered region is represented as a pair of sequence coordinates separated by a space. The predicted regions per protein are in the [Additional file 2].

### S3 Short Linear Motifs

The SLiM sets computed were generated as CSV files with names like ca\_motifs\_D.csv with the HIV-1 protein name as prefix, and the set name as suffix. The protein name is one of the names in Table S1, the suffixes used are in Table S2. Unions like  $C \cup D$  were represented in filenames as suffixes uCD and intersections like  $D \cap R$  as iDR.

Each SLiM is identified in the files by the same identifier used in the ELM database (e.g. LIG\_GSK3\_LRP6\_1) [4, 5]. The number of SLiMs per set is reported in Table S3 and the actual SLiMs are in the [Additional file 3].

**Table S2 Suffixes used in the filenames of the the SLiM sets**

| SLiM set                          | Suffix |
|-----------------------------------|--------|
| Conserved [6]                     | C      |
| Disordered [7]                    | D      |
| Rare [7]                          | R      |
| Conserved and disordered          | iCD    |
| Conserved and rare                | iCR    |
| Disordered and rare               | iDR    |
| Conserved and disordered and rare | iCDR   |
| Conserved or disordered           | uCD    |
| Conserved or rare                 | uCR    |
| Disordered or rare                | uDR    |
| Conserved or disordered or rare   | uCDR   |

**Table S3 Number of SLiMs by filter criterion.**

| Protein | C  | D   | R   | C ∪ D | C ∪ R | D ∪ R | C ∪ D ∪ R | C ∩ D | D ∩ R |
|---------|----|-----|-----|-------|-------|-------|-----------|-------|-------|
| ca      | 35 | 108 | 101 | 108   | 136   | 209   | 244       | 35    | 11    |
| env     | 52 | 103 | 95  | 105   | 147   | 198   | 250       | 50    | 6     |
| gag     | 44 | 114 | 98  | 114   | 142   | 212   | 256       | 44    | 11    |
| gp41    | 35 | 37  | 83  | 55    | 118   | 120   | 155       | 17    | 0     |
| gp120   | 39 | 108 | 100 | 108   | 139   | 208   | 247       | 39    | 9     |
| in      | 40 | 19  | 100 | 46    | 140   | 119   | 159       | 13    | 3     |
| ma      | 20 | 67  | 132 | 69    | 152   | 199   | 219       | 18    | 14    |
| nc      | 4  | 43  | 131 | 43    | 135   | 174   | 178       | 4     | 16    |
| nef     | 30 | 89  | 123 | 91    | 153   | 212   | 242       | 28    | 8     |
| p1      | 1  | 21  | 105 | 21    | 106   | 126   | 127       | 1     | 7     |
| p6      | 16 | 92  | 125 | 92    | 141   | 217   | 233       | 16    | 17    |
| pol     | 63 | 70  | 103 | 81    | 166   | 173   | 236       | 52    | 1     |
| pr      | 18 | 0   | 28  | 18    | 46    | 28    | 46        | 0     | 0     |
| rev     | 23 | 99  | 111 | 99    | 134   | 210   | 233       | 23    | 7     |
| rt      | 51 | 51  | 90  | 63    | 141   | 141   | 192       | 39    | 1     |
| rtp51   | 46 | 43  | 104 | 61    | 150   | 147   | 193       | 28    | 3     |
| tat     | 24 | 71  | 119 | 71    | 143   | 190   | 214       | 24    | 3     |
| vif     | 33 | 56  | 97  | 59    | 130   | 153   | 186       | 30    | 0     |
| vpr     | 17 | 37  | 114 | 45    | 131   | 151   | 168       | 9     | 1     |
| vpu     | 15 | 23  | 97  | 30    | 112   | 120   | 135       | 8     | 5     |

For HIV-1 proteins we report the number of SLiMs conserved in more than 70% of the HIV-1 sequences (*C*), the number of SLiMs found in disordered protein regions (*D*), the number of rare –hard to form by pure chance– SLiMs (*R*) and the derived union and intersection sets sizes. Column values for sets  $C \cap R$  (conserved and rare) and  $C \cap D \cap R$  (conserved, rare, located in disordered regions) are not included for being almost null.

### S4 Interactions

#### S4.1 Human-HIV1 interactions in the NIAID database

The number of predicted interactions per set and HIV-1 protein is presented in Tables S4 and S5. The first one presents the interactions validated in the NIAID database and the second one the interactions not present in the NIAID database [8], the candidate interactions. These interactions are in the [Additional file 1], this is a CSV file named with the pattern: hivProtein-interactions-suffix.csv.

Where hivProtein is one of the names in Table S1 and the suffix is one of the names in Table S2. Each file includes the human proteins using their Uniprot id. Each file contains for every HIV-1 protein, and SLiM set used for inference, a set of human proteins identified by Uniprot ids [9].

**Table S4 Number of predicted interactions based on the SLiM set that have experimental support in NIAID PPI database.**

|         | <i>C</i> | <i>D</i> | <i>R</i> | <i>C ∪ D</i> | <i>C ∪ R</i> | <i>D ∪ R</i> | <i>C ∪ D ∪ R</i> | <i>C ∩ D</i> | <i>D ∩ R</i> |
|---------|----------|----------|----------|--------------|--------------|--------------|------------------|--------------|--------------|
| ca      | 6        | 6        | 6        | 6            | 9            | 9            | 9                | 6            | 1            |
| env     | 11       | 13       | 6        | 13           | 11           | 13           | 13               | 11           | 0            |
| gag-pol | 0        | 6        | 10       | 6            | 10           | 10           | 10               | 0            | 5            |
| gag     | 10       | 23       | 27       | 23           | 30           | 35           | 35               | 10           | 10           |
| gp41    | 4        | 3        | 7        | 5            | 7            | 8            | 8                | 2            | 0            |
| gp120   | 25       | 40       | 37       | 40           | 42           | 52           | 52               | 25           | 0            |
| in      | 8        | 1        | 12       | 8            | 12           | 12           | 12               | 1            | 0            |
| ma      | 6        | 13       | 16       | 13           | 17           | 17           | 17               | 6            | 11           |
| nc      | 0        | 2        | 5        | 2            | 5            | 5            | 5                | 0            | 2            |
| nef     | 20       | 26       | 34       | 26           | 40           | 43           | 43               | 20           | 0            |
| p1      | 0        | 0        | 0        | 0            | 0            | 0            | 0                | 0            | 0            |
| p6      | 0        | 0        | 0        | 0            | 0            | 0            | 0                | 0            | 0            |
| pol     | 1        | 1        | 2        | 1            | 2            | 2            | 2                | 1            | 0            |
| pr      | 3        | 0        | 5        | 3            | 6            | 5            | 6                | 0            | 0            |
| rev     | 7        | 11       | 7        | 11           | 7            | 11           | 11               | 7            | 2            |
| rt      | 4        | 2        | 5        | 4            | 5            | 5            | 5                | 2            | 0            |
| rtp51   | 0        | 0        | 0        | 0            | 0            | 0            | 0                | 0            | 0            |
| tat     | 32       | 43       | 53       | 43           | 59           | 67           | 67               | 32           | 3            |
| vif     | 8        | 8        | 6        | 8            | 8            | 8            | 8                | 8            | 0            |
| vpr     | 7        | 14       | 20       | 14           | 20           | 25           | 25               | 7            | 2            |
| vpu     | 5        | 6        | 9        | 6            | 9            | 10           | 10               | 5            | 4            |

**Table S5 Interactions predicted and not validated in the NIAID database**

| protein | <i>C</i> | <i>D</i> | <i>R</i> | <i>C ∪ D</i> | <i>C ∪ R</i> | <i>D ∪ R</i> | <i>C ∪ D ∪ R</i> | <i>C ∩ D</i> | <i>D ∩ R</i> |
|---------|----------|----------|----------|--------------|--------------|--------------|------------------|--------------|--------------|
| ca      | 3045     | 6483     | 5743     | 6483         | 7319         | 9008         | 9008             | 3045         | 1027         |
| env     | 4382     | 5999     | 5648     | 6033         | 7730         | 9028         | 9061             | 4348         | 598          |
| gag-pol | 5255     | 7179     | 5139     | 7326         | 8192         | 9339         | 9405             | 5108         | 199          |
| gag     | 4237     | 6794     | 5386     | 6794         | 7614         | 9139         | 9139             | 4237         | 1030         |
| gp41    | 3735     | 4067     | 5208     | 4851         | 6617         | 6908         | 7497             | 2751         | 0            |
| gp120   | 3819     | 6058     | 5419     | 6058         | 7100         | 8832         | 8832             | 3819         | 678          |
| in      | 3828     | 1613     | 6323     | 3915         | 7606         | 6605         | 7645             | 1476         | 62           |
| ma      | 2922     | 5134     | 7007     | 5175         | 7955         | 8752         | 8760             | 2692         | 2654         |
| nc      | 194      | 4462     | 7533     | 4462         | 7578         | 8146         | 8146             | 194          | 2971         |
| nef     | 3375     | 5793     | 6875     | 5826         | 8053         | 9672         | 9691             | 3341         | 1017         |
| p1      | 0        | 2771     | 6967     | 2771         | 6967         | 7497         | 7497             | 0            | 1417         |
| p6      | 2008     | 5492     | 6910     | 5492         | 7552         | 9365         | 9365             | 2008         | 1465         |
| pol     | 4854     | 5354     | 5917     | 5703         | 8377         | 8840         | 9025             | 4498         | 140          |
| pr      | 2744     | 0        | 2937     | 2744         | 4069         | 2937         | 4069             | 0            | 0            |
| rev     | 3282     | 6340     | 6143     | 6340         | 7052         | 9044         | 9044             | 3282         | 935          |
| rt      | 4075     | 4288     | 5638     | 4985         | 7762         | 7753         | 8126             | 3366         | 50           |
| rtp51   | 4115     | 4003     | 6482     | 5220         | 8269         | 8274         | 8772             | 2825         | 113          |
| tat     | 2753     | 4928     | 6545     | 4928         | 7259         | 8932         | 8932             | 2753         | 159          |
| vif     | 3284     | 4026     | 5583     | 4075         | 6766         | 7414         | 7442             | 3215         | 0            |
| vpr     | 2312     | 3381     | 6922     | 3920         | 7696         | 7989         | 8491             | 1723         | 96           |
| vpu     | 2420     | 2916     | 5769     | 3353         | 6375         | 6426         | 6690             | 1895         | 1439         |

The number of interactions predicted is high in many cases. The reason is the number of proteins and isoforms that contain a domain that is deemed to interact with a SLiM.

### S4.2 Human-HIV1 interactions in the LMPID database

In Table S6 we report the SLiM-mediated interactions between HIV-1 and humans that were extracted from the LMPID database [10].

**Table S6 Interactions between HIV-1 and human proteins mediated by a SLiM as identified in LMPID.**

| HIV-1 | Human Protein Name                                               |
|-------|------------------------------------------------------------------|
| gag   | Programmed cell death 6-interacting protein                      |
| gag   | Tumor susceptibility gene 101 protein                            |
| nef   | Tyrosine-protein kinase HCK                                      |
| nef   | Tyrosine-protein kinase Fyn                                      |
| tat   | Serine/threonine-protein phosphatase PP1-alpha catalytic subunit |
| vpu   | F-box/WD repeat-containing protein 1A                            |

## S5 Sensitivity and specificity

Although there is no gold-standard dataset for VHPPIs we use the NIAID database to estimate the sensitivity of the SLiM-based predictions. We iterate through all possible interactions between human and HIV-1 proteins to compute the true positives, true negatives, false positives and false negatives. Tables S7 and S8 report the sensitivity and specificity. The values are discriminated per HIV-1 protein and SLiM set used to infer the interactions.

## S6 Mappings used

### S6.1 RefSeqs to Uniprot Ids

To map the NIAID human-HIV-1 interactions given in RefSeqs to Uniprot Ids given in the ELM database we use the files in the Uniprot FTP. contains the correspondence between Uniprot ids and other databases ids like RefSeq.

`ftp://ftp.uniprot.org/pub/databases/uniprot/current_release/knowledgebase/idmapping/by_organism/HUMAN_9606_idmapping.dat.gz`

**Table S7 Sensitivity percentage for SLiM sets prediction over HIV-1 proteins**

| protein | $C$  | $D$  | $R$  | $C \cup D$ | $C \cup R$ | $D \cup R$ | $C \cup D \cup R$ | $C \cap D$ | $D \cap R$ |
|---------|------|------|------|------------|------------|------------|-------------------|------------|------------|
| ca      | 1.99 | 3.90 | 3.82 | 3.90       | 4.54       | 5.16       | 5.16              | 1.99       | 0.75       |
| env     | 2.12 | 2.97 | 3.13 | 2.97       | 3.79       | 4.42       | 4.42              | 2.12       | 0.19       |
| gag-pol | 3.67 | 4.05 | 3.07 | 4.45       | 4.82       | 5.03       | 5.14              | 3.27       | 0.09       |
| gag     | 2.21 | 3.16 | 2.26 | 3.16       | 3.31       | 3.83       | 3.83              | 2.21       | 0.50       |
| gp41    | 2.30 | 2.58 | 3.03 | 2.97       | 3.70       | 3.91       | 4.13              | 1.81       | 0.00       |
| gp120   | 1.17 | 1.85 | 1.84 | 1.85       | 2.12       | 2.60       | 2.60              | 1.17       | 0.23       |
| in      | 2.56 | 1.72 | 3.86 | 2.65       | 4.45       | 4.28       | 4.48              | 1.63       | 0.08       |
| ma      | 1.74 | 2.78 | 3.77 | 2.83       | 4.21       | 4.57       | 4.57              | 1.35       | 1.36       |
| nc      | 0.18 | 3.00 | 4.24 | 3.00       | 4.24       | 4.60       | 4.60              | 0.18       | 2.33       |
| nef     | 1.14 | 2.31 | 2.49 | 2.31       | 2.62       | 3.28       | 3.28              | 1.14       | 0.41       |
| p1      | 0.00 | 2.04 | 4.55 | 2.04       | 4.55       | 4.82       | 4.82              | 0.00       | 1.53       |
| p6      | 1.52 | 3.36 | 4.84 | 3.36       | 5.07       | 5.80       | 5.80              | 1.52       | 1.17       |
| pol     | 3.59 | 3.43 | 4.03 | 3.88       | 5.57       | 5.61       | 5.76              | 3.14       | 0.01       |
| pr      | 1.48 | 0.00 | 2.02 | 1.48       | 2.57       | 2.02       | 2.57              | 0.00       | 0.00       |
| rev     | 2.08 | 3.79 | 3.99 | 3.79       | 4.44       | 5.27       | 5.27              | 2.08       | 0.21       |
| rt      | 2.75 | 2.60 | 3.46 | 3.01       | 4.54       | 4.51       | 4.69              | 2.34       | 0.00       |
| rtp51   | 3.09 | 2.64 | 4.41 | 3.60       | 5.41       | 5.38       | 5.63              | 2.11       | 0.09       |
| tat     | 0.98 | 1.48 | 2.17 | 1.48       | 2.39       | 2.73       | 2.73              | 0.98       | 0.05       |
| vif     | 2.01 | 2.42 | 3.22 | 2.42       | 3.90       | 4.19       | 4.19              | 1.94       | 0.00       |
| vpr     | 0.81 | 1.65 | 3.11 | 1.86       | 3.36       | 3.59       | 3.81              | 0.59       | 0.06       |
| vpu     | 1.34 | 1.72 | 2.75 | 1.95       | 2.89       | 3.28       | 3.34              | 0.93       | 1.00       |

**Table S8 Specificity percentage for SLiM sets prediction over HIV-1 proteins**

| protein | $C$    | $D$    | $R$   | $C \cup D$ | $C \cup R$ | $D \cup R$ | $C \cup D \cup R$ | $C \cap D$ | $D \cap R$ |
|---------|--------|--------|-------|------------|------------|------------|-------------------|------------|------------|
| ca      | 98.87  | 97.62  | 97.4  | 97.62      | 96.91      | 96.41      | 96.41             | 98.87      | 99.61      |
| env     | 98.40  | 97.74  | 97.41 | 97.72      | 96.84      | 96.41      | 96.40             | 98.42      | 99.71      |
| gag-pol | 97.98  | 97.38  | 97.6  | 97.28      | 96.59      | 96.36      | 96.31             | 98.08      | 99.94      |
| gag     | 98.41  | 97.57  | 97.56 | 97.57      | 96.86      | 96.43      | 96.43             | 98.41      | 99.61      |
| gp41    | 98.58  | 98.34  | 97.85 | 98.09      | 97.47      | 97.32      | 97.15             | 98.91      | 100.00     |
| gp120   | 98.65  | 97.77  | 97.62 | 97.77      | 97.19      | 96.6       | 96.60             | 98.65      | 99.69      |
| in      | 98.53  | 99.3   | 97.48 | 98.51      | 97.09      | 97.36      | 97.09             | 99.33      | 99.97      |
| ma      | 98.84  | 98.08  | 97.19 | 98.06      | 96.91      | 96.74      | 96.73             | 98.96      | 98.79      |
| nc      | 99.91  | 98.25  | 97.09 | 98.25      | 97.07      | 96.91      | 96.91             | 99.91      | 98.79      |
| nef     | 98.72  | 97.87  | 97.06 | 97.87      | 96.74      | 96.25      | 96.25             | 98.72      | 99.59      |
| p1      | 100.00 | 98.9   | 97.18 | 98.9       | 97.18      | 97.00      | 97.00             | 100.00     | 99.40      |
| p6      | 99.24  | 97.96  | 96.97 | 97.96      | 96.85      | 96.33      | 96.33             | 99.24      | 99.37      |
| pol     | 98.13  | 97.94  | 97.35 | 97.76      | 96.59      | 96.44      | 96.36             | 98.31      | 99.90      |
| pr      | 98.93  | 100.00 | 98.86 | 98.93      | 98.48      | 98.86      | 98.48             | 100.00     | 100.00     |
| rev     | 98.60  | 97.65  | 97.23 | 97.65      | 96.9       | 96.44      | 96.44             | 98.60      | 99.58      |
| rt      | 98.46  | 98.41  | 97.47 | 98.06      | 96.82      | 96.89      | 96.69             | 98.80      | 99.99      |
| rtp51   | 98.38  | 98.48  | 97.16 | 97.95      | 96.59      | 96.63      | 96.42             | 98.96      | 99.98      |
| tat     | 98.87  | 98.18  | 97.28 | 98.18      | 97.06      | 96.55      | 96.55             | 98.87      | 99.95      |
| vif     | 98.74  | 98.52  | 97.52 | 98.50      | 97.20      | 96.99      | 96.99             | 98.76      | 100.00     |
| vpr     | 99.09  | 98.71  | 97.04 | 98.53      | 96.8       | 96.75      | 96.58             | 99.27      | 99.95      |
| vpu     | 99.03  | 98.81  | 97.5  | 98.66      | 97.34      | 97.32      | 97.25             | 99.23      | 99.37      |

## S6.2 Domains to Proteins

To map the domains given in the ELM database to proteins containing them we use the Pfam mapping from the ftp:

`ftp://ftp.ebi.ac.uk/pub/databases/Pfam/releases/Pfam28.0/proteomes/9606.tsv.gz.`

### References

1. Kuiken C, Korber B, Shafer RW. HIV sequence databases. *AIDS Rev.* 2003;5(1):52–61.
2. Dosztanyi Z, Csizmok V, Tompa P, Simon I. The pairwise energy content estimated from amino acid composition discriminates between folded and intrinsically unstructured proteins. *J Mol Biol.* 2005 Apr;347(4):827–839.
3. Hagai T, Azia A, Toth-Petroczy A, Levy Y. Intrinsic disorder in ubiquitination substrates. *J Mol Biol.* 2011 Sep;412(3):319–324.
4. Dinkel H, Michael S, Weatheritt RJ, Davey NE, Van Roey K, Altenberg B, et al. ELM—the database of eukaryotic linear motifs. *Nucleic Acids Res.* 2012 Jan;40(Database issue):D242–251.
5. Dinkel H, Van Roey K, Michael S, Kumar M, Uyar B, Altenberg B, et al. ELM 2016-data update and new functionality of the eukaryotic linear motif resource. *Nucleic Acids Res.* 2015 Nov;.
6. Evans P, Dampier W, Ungar L, Tozeren A. Prediction of HIV-1 virus-host protein interactions using virus and host sequence motifs. *BMC Med Genomics.* 2009;2:27.
7. Hagai T, Azia A, Babu MM, Andino R. Use of host-like peptide motifs in viral proteins is a prevalent strategy in host-virus interactions. *Cell Rep.* 2014 Jun;7(5):1729–1739.
8. Fu W, Sanders-Beer BE, Katz KS, Maglott DR, Pruitt KD, Ptak RG. Human immunodeficiency virus type 1, human protein interaction database at NCBI. *Nucleic Acids Res.* 2009 Jan;37(Database issue):D417–422.
9. Bateman A, Martin MJ, O'Donovan C, Magrane M, Apweiler R, Alpi E, et al. UniProt: a hub for protein information. *Nucleic Acids Res.* 2015 Jan;43(Database issue):D204–212.
10. Sarkar D, Jana T, Saha S. LMPID: a manually curated database of linear motifs mediating protein-protein interactions. *Database (Oxford).* 2015;2015.
